# Supplementary material
Source: Research Square preprint supplement (doi:10.21203/rs.3.rs-7875068/v1)
Supplement: Supplementary file 1 [file bfd3aea7dfa0a94a87d111bd.docx]

**Supplementary Information**

**Ultrathin polyurea nanofilms via interfacial self-polymerization**

Jianhang Qiu 1, 2, Heguo Han 1, 2, Zheng Liu 1, 2, Linjian Sang 1, 2, Yuxuan Sun 1 *, Shenghai Li 1, 2, Suobo Zhang 1, 2*

1 Laboratory of Polymer Materials Engineering, Changchun Institute of Applied Chemistry, Chinese Academy of Sciences, Changchun 130022, China.

2School of Applied Chemistry and Engineering, University of Science and Technology of China, Hefei 230026, China.

3 State Key Laboratory of Polymer Science and Technology, Changchun Institute of Applied Chemistry, Chinese Academy of Sciences, Changchun 130022, China.

*Corresponding author: E-mail: sbzhang@ciac.ac.cn (S. Zhang); yxsun@ciac.ac.cn (Y. Sun)

**This file includes:**

Supplementary Methods

Supplementary Figures 1 to 14

Supplementary Scheme S1

Supplementary Tables 1-5

Supplementary References 15

1. **Supplementary Methods**
   1. **Materials**

The support layer of the nanofiltration membranes were self-made PEEK ultrafiltration membranes. Trimesoyl chloride (TMC, > 98%), m-phenylenediamine (MPD, > 99%) and PEEK were purchased from Shanghai Aladdin Reagent Company as reaction materials;). Tetrahydrofuran, toluene, n-heptane, dioxane, N, N-dimethylformamide (DMF), acetone, isopropanol, methanol, ethanol, xylene, ethyl acetate, butyl acetate, acetonitrile, n-hexane etc. were obtained from Sinopharm Chemical Reagent Co., Ltd without requiring further purification. NaN3 (> 98%), NaCl (> 99%), NaHCO3 (> 98%), and MgSO4 (> 98%) were purchased from Sigma-Aldrich. Sudan orange (SO, > 98%), methyl orange (MO, > 98%), sunset yellow (SY, > 98%), acid fuchsin (AF, > 98%), Congo red (CR, > 98%), and polyethylene glycol (PEG, > 98%) were purchased from Macklin Co., Ltd, and their chemical structures and properties are listed in SupplementaryTable 4.

- 1. **Monomer synthesis**

Preparation method of TRI monomer reference literature (Supplementary Scheme 1)1, 2. NaN3 (9.88 g, 152 mmol, 4.0 eq) and 60 mL deionized water were added to a 250 mL round-bottom flask containing a magnetic stirring rod and stirred at room temperature until NaN3 dissolved completely. TMC (10 g, 38 mmol, 1.0 eq) was dissolved in 60 ml of THF, and the THF solution was slowly dripped into an aqueous solution for 20 min at 0°C. After reaction for 3 h, the reaction liquid was poured into 300 mL toluene for extraction, and 60 mL toluene was used to wash the water phase twice. The organic phase was combined and washed in sequence via a sodium hydroxide solution, a saturated Sodium bicarbonate solution, and a saturated salt solution. The washed organic phase was dried with anhydrous magnesium sulfate for 24 hours, the desiccant was removed, and the dried organic phase was placed in a 1 L round bottom flask with a magnetic stirring rod, Curtis rearrangement reaction was performed at 100°C for 2.5 h. Then the reaction solution was decompressed and distilled, and the TRI was recrystallized from 400 mL of n-hexane to yield colorless needle-shaped crystals. The crystals were filtered, vacuum-dried at 80°C for 12 hours, and stored in a sealed container. Yield: 80%.

The product TRI was analyzed by 1H NMR and 13C NMR. 1H NMR (500 MHz, CDCl3-d6, δ): 6.72 ppm (s, 3H, Ar H); 13C NMR (400 MHz, CDCl3-d6, δ), 119 ppm (s), 125 ppm (s), 135 ppm (s), (Supplementary Fig. 13).

**1.3. Fabrication of free-standing polyurea nano-films and polymer powder**

Free-standing nano-films were fabricated using an unsupported ISP method. The method involved the following sequential steps. Aqueous and organic phase solutions were slowly dispensed into a tilted dish via a dropper, which formed an unsupported nano-film at the water/cyclohexane interface. Subsequently, the nano-film was carefully transferred onto a silicon wafer and subjected to repeated rinsing with cyclohexane.

Polymer powders were obtained by following steps. The aqueous phase solution and the organic phase solution were added to a beaker synchronously, and interfacial polymerization was carried out under agitation. The resulting flocculent polymers were transferred out and washed sequentially with water, cyclohexane, and methanol, followed by drying at 80 °C for 24 hours.

**1.4.** **Preparation of Polyurea Composite Membranes**

Polyurea composite membranes were prepared via ISP on self-made PEEK ultrafiltration membranes. The preparation process involved the following steps: Firstly, the ultrafiltration membrane was immersed in a solution of TBAB at a certain concentration for 2 minutes to ensure complete wetting of the membrane surface. Excess solution was then carefully removed, and the membrane was allowed to air dry naturally. Subsequently, the membrane was immersed in a cyclohexane solution containing a specific concentration of TRI for a defined period to facilitate the ISP reaction. After the reaction, the organic phase was discarded, and the membrane was air-dried at room temperature for 3 minutes. To eliminate any unreacted TRI, the membrane was rinsed with 30 mL of cyclohexane, ensuring the removal of residual reactants and maintaining the cleanliness and uniformity of the membrane surface.

A polyamide nanofiltration membrane was synthesized utilizing TMC as the organic phase monomer and MPD as the aqueous phase monomer. Similar to the preparation of polyurea membranes, the final step involved drying the membrane in a convection oven at 80°C for 2 minutes. This membrane was designated as TMC/MPD. Specifically, the TMC concentration was set at 0.1 wt%, while the MPD concentration was adjusted to 2 wt%. This approach ensured a precise control over the membrane's composition.

**1.5. Preparation of poly (ether ether ketone) (PEEK) support layer ultrafiltration membrane**

The ultrafiltration membrane was fabricated via the non-solvent induced phase separation method. 18 wt% PEEKI and 2 wt% PVPK30 were dissolved in N-methyl-2-pyrrolidone (NMP). After degassing and stewing for 12 h, the solution was then cast uniformly onto a non-woven fabric substrate using a blade with a controlled gap of 0.14 mm. Subsequently, the cast film was immersed in deionized water maintained at 50°C to induce phase separation and form the ultrafiltration membrane. To enhance solvent resistance, the membrane was further treated by immersion in a 1 wt% hydrochloric acid solution at 70°C for over 24 hours3.

**1.6. Characterization**

The chemical structure of the monomer was characterized via 1H-NMR (Bruker AV500),13C-NMR (Bruker AV400). The elemental composition on the surface of the membranes was confirmed via X-ray photoelectron spectroscopy (XPS, Escalab 280 system). Scanning electron microscopy (Zeiss Merlin FE-SEM) and Transmission Electron Microscopy (TEM, JEM-F200, JEOL, Japan) were used to analyze the cross-section morphology of the polyurea composite membranes. The cross-section was obtained by breaking the membranes in liquid nitrogen. Atomic force microscopy (AFM) was conducted using a Bruker Dimension Icon SPM. Tapping mode was utilized to image a 5 x 5 μm surface area. Measurements were performed at multiple points to confirm the uniformity of the thickness of the nanofilms and the average values are presented. The calculation of interfacial tension between aqueous phase and organic phase was conducted using the Micro pendant drop method with the assistance of Shengding Optical Contact Angle Measuring Instrument (SDC-100S). The contact angle of the membranes was measured using a Kruss TC3013 Optical Tensiometer (Hamburg, Germany) employing the sessile drop method. The PUA membranes was dried at a temperature of 60oC for 5 hours before the test, 5 test points were taken from each sample for testing and the average value was taken.

The chemical structure of the polymer was confirmed via Fourier-transform infrared (FTIR, Bio-Rad Digilab Division FTS-80) spectroscopy. X-ray Diffraction (XRD) data were collected on a Siemens P4 four-circle diffractometer operating at 40 kV and 200 mA at 293 K. The microporosity texture in the bulk polymer was determined through the BET technique, using a Micromeritics ASAP™ 2020 system (Atlanta, GA, USA) with a micropore option. Powder polymer samples were degassed under a high vacuum at 100°C for 12 hours before analysis. N2 was chosen as the probing molecule for measuring sorption uptake and was measured at 77 K at absolute pressures of 0–1 bar. The in-situ FTIR was conducted using the Mettler Toledo React IR 15 instrument, with points collected every 15 s and the experimental temperature set at 303 K. The positron annihilation experiments were conducted by using a fast–fast coincidence PALS with a time resolution of 0.180 ns for the full width at half maximum (FWHM), and 1 million counts were collected for each spectrum. The lifetime spectra were analyzed using the data-processing programs PATFIT and LT from PALS.

**1.7. Organic solvent nanofiltration tests**

The performance of the nanofiltration membranes was assessed using a laboratory-scale cross-flow filtration system operated at a constant pressure of 10 bar. Each filtration cell had an effective membrane area of 15.8 cm². Prior to the experiments, the nanofiltration membranes were stabilized for 2 hours under the testing conditions to ensure consistent permeance and rejection rates. Solute solutions were prepared by dissolving 40 ppm of various dyes in methanol. To determine the molecular weight cut-off (MWCO) of the membranes, their rejection capabilities were evaluated using dyes of varying molecular weights dissolved in methanol.

Where V (L) is the volume of permeate water, A (m2) is the membrane filtration area, ΔT (h) is the testing time, and ΔP (bar) is the testing pressure.

where *Cp* is the concentration of the dye in the permeation solutions and *Cf* is the concentration of the dye in the feed solutions. The dye concentrations were determined using an ultraviolet–visible spectrophotometer by monitoring the highest ultraviolet absorption peak. The average of the three parallel results was used to determine the permeation and rejection values.

**1.8. Simulation method**

Materials Studio software (BIOVIA Materials Studio® 2020) software was used to calculate the porosity of polyurea and polyamide nanofiltration membranes. Trimesoyl chloride (TMC) has three acyl chloride groups, while m-phenylenediamine (MPD) has two amino groups. The minimum unit of the PA model was obtained by combining two monomers in a ratio of 4:6. Meanwhile, due to the presence of 3 isocyanate groups in TRI, the smallest unit of the polyurea model was obtained by combining it in a ratio of 5:5 (Supplementary table 5).

After molecular optimization of the smallest units of the two models, simulations were performed using the software BIOVIA Materials Studio® 2020 with the COMPASS II force field for energy minimization and molecular dynamics (MD) simulation. 4-6 The smallest units of the two optimized polymers are shown in Supplementary Fig. 14. 10 minimum units and 250 water molecules were randomly inserted into the unit cell to prepare a simulated unit cell with periodic boundaries in all directions. The initial density of each unit cell is set to 1 g/m3 Under the condition that N (number of molecules), P (pressure), and T (temperature) were constant, MD simulation was performed at a pressure of 0.1 MPa and 298 K for 300 ps (NPT ensemble). Furthermore, MD simulation of 300 ps at 298 K was also performed under the condition that N, V (volume), and T (temperature) were constant (NVT ensemble). The time step for calculation of 0.5 fs was employed.

**1.9. Characterization of surface elements of polyurea nanofiltration membrane**

Since the average XPS scanning depth is 5-10 nm, it can be used to analysis the elemental composition and chemical bonding eof the polyurea selective layer of membranes. Perform XPS characterization on the prepared nanofiltration membranes. High-resolution XPS spectra are shown in Supplementary Fig. 1.

**1.10. Molecular weight cut-off test in water**

To further elucidate the retention mechanism of the nanofiltration membranes fabricated in this study, the rejecting performance of neutral-charged polyethylene glycol (PEG) was evaluated, as depicted in Supplementary Fig. 8. The rejection rates of the nanofiltration membranes were tested using aqueous solutions of PEG with molecular weights of 200, 300, 400, and 600 Da at a concentration of 1000 ppm. The results revealed that the nanofiltration membrane exhibited a molecular weight cut-off (MWCO) of 427 Da, which corresponds to its effective separation threshold for solutes in aqueous solutions. This MWCO value is consistent with the membrane's molecular weight cut-off behavior in organic solvents, further confirming its versatile separation capabilities.

**1.11. Characterization of Interface Aggregation Reaction Mechanism.**

Real-time monitoring and tracking of the structural evolution of raw materials and products during interfacial polymerization were conducted via in-situ FTIR. The experimental cycle was set to 1 hour, with spectral scans performed every 15 s. The experimental protocol proceeded as follows: Initially, the FTIR instrument scanned the air environment for the first 10 minutes to establish a baseline calibration. Subsequently, spectral characterization of the pure organic solvent (1,4-dioxane) was conducted between 10 and 20 minutes. At the 20 minutes mark, a predetermined concentration of TRI monomer was introduced into the organic phase to form the reaction solution. This solution was maintained at room temperature and continuously monitored for an additional 10 minutes. Following this stabilization period, 3 mL of deionized water was injected into the organic phase to initiate interfacial polymerization, with the reaction process tracked continuously thereafter. The choice of 1,4-dioxane as the solvent was strategic, as its minimal spectral interference in the 1500–1700 cm-1 range ensured minimal overlap with the characteristic peaks of TRI and polyurea.

Spectral analysis revealed key structural transformations during the reaction. Upon the addition of the TRI monomer at the 20 minutes mark, a characteristic absorption peak corresponding to the aromatic C=C stretching vibrations of the TRI benzene ring emerged at 1600 cm-1. Within 10 min following the addition of water, this peak shifts to 1615 cm-1, indicative of the hydrolysis of the isocyanate (-NCO) groups. Concurrently, a sharp absorption band appeared at 1560 cm-1, attributed to the stretching vibration of the secondary amine (N-H) group within the polyurea structure7. Simultaneously, two characteristic peaks emerged at 1685 cm-1 and 1720cm-1, assignable to the stretching vibration of the carbonyl (C=O) group in polyurea. This is attributed to the fact that the characteristic absorption signals associated with polyurea arise from two distinct carbonyl group environments: free carbonyl groups and hydrogen-bonded carbonyl groups8, 9. Notably, the intensities of these characteristic peaks (at 1560 cm-1 1685 cm-1 and 1720 cm-1) gradually increased with the progression of the reaction. These observations confirm the proposed reaction pathway: rapid hydrolysis of isocyanate groups upon contact with the aqueous phase, followed by self-polymerization to form polyurea.

**1.12. Mechanical characterization of nanofilms**

The mechanical properties of the self-standing nanofilms were characterized using PeakForce Quantitative NanoMechanical Mapping (PFQNM). Given the ultrathin polyurea active layer (<10 nm) and potential substrate interference, the Sneddon model was selected for modulus calculations due to its suitability for stiff materials with minimal probe compliance assumptions. As shown in Supplementary Fig. 3, the average Young’s moduli of the selected regions in the PA nanofiltration membrane and polyurea nanofiltration membrane were 44.6 MPa and 102 MPa, respectively. This result demonstrates that the polyurea nanofiltration membrane exhibits significantly enhanced mechanical strength, which is attributed to its high crosslinking density and hydrogen bond density. The elevated mechanical robustness is expected to improve compressive resistance and swelling stability, critical factors for long-term membrane performance under practical operating conditions.

**2. Supplementary Figures**

**Supplementary Fig. 1 Characterization of PUR films. a-j** Corresponding height profile of the free-standing nanofilm on top of a silicon wafer of PUR films; **k-o** XPS N1s spectra of the PUR films.

**Supplementary Fig. 2**  (a) CO2 adsorption isotherms of PUR and PA measured at 273 K; (b) The corresponding pore distribution by density functional theory (DFT) pore analysis; (c) Normalized positron annihilation lifetime spectra. Calculation method: Infinite deep spherical square potential well model of o-ps.

**Supplementary Fig. 3** The obtained Young's modulus of the PA films (Sneddon model).

**Supplementary Fig. 4** (a)Top surface and (b) Cross-section SEM images of PEEK substrates.

**Supplementary Fig. 5** **Top surface SEM images of composite membranes.** (a) TMC/MPD, (b) ISP-TRI-10 s, (c) ISP-TRI-20 s, (d) ISP-TRI-30 s, (e) ISP-TRI-40 s, (f) ISP-TRI-50 s.

**Supplementary Fig. 6** AFM surface morphology of PUR membranes (a) ISP-TRI-10 s, (b) ISP-TRI-20 s, (c) ISP-TRI-30 s, (d) ISP-TRI-40 s, (e) ISP-TRI-50 s.

**Supplementary Fig. 7** Rejection versus the molecular weight of polyethylene glycol for ISP-TRI-20 s in water.

**Supplementary Fig. 8** Characterization of water contact angle of PEEK substrates.

**Supplementary Fig. 9** Characterization of water contact angle of ISP-TRI-20 s membrane.

**Supplementary Fig. 10** The separation performance of PUR membranes prepared under different concentration conditions. (a) Different concentrations of TRI, (b) different concentrations of TBAB. Test conditions: the test dye is sunset yellow and operating pressure =1.0 MPa.

**Supplementary Fig. 11** The effect of TBAB addition amount on the interfacial tension of water/cyclohexane.

**Supplementary Fig. 12** Equipment of membrane performance evaluation, the nanofiltration performance was evaluated using a lab-scale cross-flow setup.

**Supplementary Scheme S1** The synthetic route of TRI.

**Supplementary Fig. 13** 1H NMR and 13C NMR spectrum of monomers in CDCl3-*d6*.

**Supplementary Fig. 14** Optimized polymer smallest single cluster structure diagram (a) PA, (b)PUR.

**3. Supplementary Tables**

| **Membranes** | **τ3 (ns)** | **I3 (%)** | **R (Å)** | **FFV (%)** |
| --- | --- | --- | --- | --- |
| PA | 1.628 | 9.3 | 2.486 | 1.073 |
| PUR | 1.519 | 21.5 | 2.365 | 2.140 |

τ3: Corresponding to environments where positrons have a longer residence time in materials, such as larger pores, free volume regions, or defect aggregation regions. Positron residence time reflects larger pores or free volume regions in materials.

I3: The proportion of positron annihilation events corresponding to the τ3 component to the total events reflects the relative contribution of that lifetime component.

**Supplementary Table 1** Dataono-Ps lifetime (τ3), relativeintensity (I3), meanfree-volumeradius (R) and, fractional freevolume (FFV) for PA and PUR.

| **Solvent** | **dm**  **(nm)** | **η a**  **(×10−3, Pa s)** | **δp b**  **(MPa0.5)** | **(×10-3)** |
| --- | --- | --- | --- | --- |
| Methanol | 0.51 | 0.547 | 12.3 | 96.5 |
| Ethanol | 0.57 | 1.056 | 8.8 | 34.5 |
| Cyclohexane | 0.55 | 0.876 | 0 | 0 |
| Acetonitrile | 0.55 | 0.37 | 18 | 186 |
| Toluene | 0.7 | 0.565 | 1.4 | 5.06 |
| Xylene | 0.6 | 0.854 | 1.0 | 3.25 |
| Butyl acetate | 0.63 | 0.732 | 3.7 | 12.7 |
| N-hexane | 0.75 | 0.3 | 0 | 0 |
| Acetone | 0.62 | 0.316 | 10.4 | 93.3 |
| Water | 0.38 | 0.9 | 16 | 123.11 |
| Tetrahydrofuran | 0.62 | 0.468 | 5.7 | 34.48 |
| Ethyl acetate | 0.47 | 0.4714 | 5.3 | 51.05 |
| Isopropanol | 0.62 | 2.1 | 6.1 | 9 |
| DMF | 0.63 | 0.7912 | 13.7 | 44.8 |

*The molar diameter (dm) was calculated using molar volume (Vm) of the solvent molecule from: 𝑚 = 2 × (3𝑉𝑚 /4𝜋 NA )1/3; where NA is the Avogadro’s number.

**Viscosity taken from reference (xxscience 2014 and NChem 2018).

***δp = solubility parameter due to dipole forces.

**Supplementary Table 2** Properties of solvents used in this work.

| **Membrane type** | **Membrane**  **material** | **MWCO (Da) in MeOH** | **Permeance (LMH·bar-1)** | | | | **References** |
| --- | --- | --- | --- | --- | --- | --- | --- |
| **MeOH** | **Acetone** | **THF** | **DMF** |
| Commercial membranes | DuraMem® 150 | 308 | 0.48 | - | 0.1 | - | 10 |
| PM-B2.4 | 600 | 1.1 | - |  | - | 3 |
| TFC membranes | PAR-BHPF | 328 | 8.0 | 8.4 | 4.0 |  | 11 |
| PAR-DHAQ | 328 | 0.6 | 0.2 | 0.04 |  |
| MPD-3%-1min-ACT | < 300 | 52.2 | 49.68 | 18.11 | 26 | 12 |
| MPD-3%-1min | < 260 | 13.73 | 19.34 | 2.59 | - |
| MPD-0.1%-10min-ACT | < 260 | 12.21 | - | - | - |
| m-CMP | 500 | 16.4 | - | - | - | 13 |
| p-CMP | 520 | 22.5 | - | - | - |
| Polyamide-CD (0.64) | 340 | 17.6 | 24.6 | 17 | - | 14 |
| Polyamide-CD (0.16) | 400 | - | - | - | - |
| BTRC/PEEK | 378 | 14 | 9 | - | 8 | 3 |
| β-CD-0.1 | ~300 | 0.2 | - | - | - | 15 |
| β-CD-0.5 | ~280 | 1.8 | - | - | - |
| β-CD-1.0 | ~280 | 5.8 | - | 3.2 | - |
| β-CD-1.5 | ~280 | 6.1 | - | - | - |
| β-CD-2.0 | 327 | 9.6 | - | - | - |
| ISP-TRI-10 s | 430 | 36 | - | - | - | This work |
| ISP-TRI-20 s | 320 | 26.3 | 55.77 | 46.16 | 33.48 |
| ISP-TRI-30 s | 320 | 21 | - | - | - |
| ISP-TRI-40 s | 300 | 14.8 | - | - | - |
| ISP-TRI-50 s | 290 | 12.0 | - | - | - |

**Supplementary Table 3** Summary of the performance of membrane with commercial membranes and the state-of-the-art OSN membranes.

| Name | Structure | Mass  (g mol-1) | Charge |
| --- | --- | --- | --- |
| Sudan Orange |  | 214.2 | 0 |
| Methyl Orange |  | 327.3 | - |
| Sunset Yellow |  | 452.4 | - |
| Acid fuschin |  | 585 | - |
| Congo red |  | 696.66 | - |

**Supplementary Table 4** Properties and structure of dye molecules used as a marker for organic solvent nanofiltration.

| Name | Structural formula | Simulation model |
| --- | --- | --- |
| TRI |  | 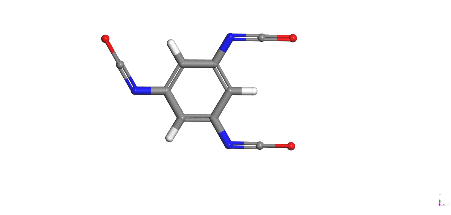 |
| TMC |  | 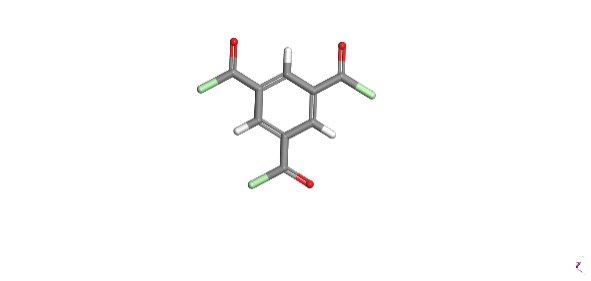 |
| MPD |  | 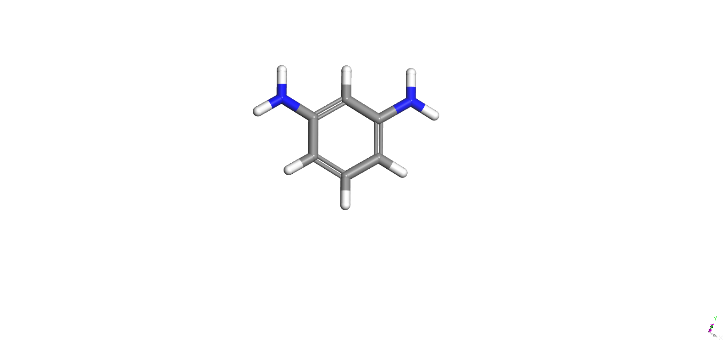 |

**Supplementary Table 5** Simulation model of monomers.

**4. Supplementary References**

1. Maaike de L, Jan HvE, Richard MK, Ben LF. C3-Symmetric, amino acid based organogelators and thickeners: a systematic study of structure–property relations. *Tetrahedron* **63**, 7285-7302 (2007).

2. Davis MC. Safer Conditions for the Curtius Rearrangement of 1,3,5‐Benzenetricarboxylic Acid. *Synthetic Communications* **37**, 3519-3530 (2007).

3. Liu Z, Zhang Q, Sun Y, Li S, Zhang S. Screening of the biphenyl polyamides nanofilms appropriate for molecular separation in organic solution feed. *Sep. Purif. Technol.* **358**, 130232-130243 (2024).

4. Sun H, et al. COMPASS II: extended coverage for polymer and drug-like molecule databases. *J. Mol. Model.* **22**, 10-21 (2016).

5. Nussinov Z, van den Brink J. Compass models: Theory and physical motivations. *Rev. Mod. Phys.* **87**, 59-70 (2015).

6. Sun H. COMPASS: An ab initio force-field optimized for condensed-phase applications - Overview with details on alkane and benzene compounds. *J. Phys. Chem. B* **102**, 7338-7364 (1998).

7. Zhao G, Sun J, Wan Y, Pan G, Zhang Y, Liu Y. Scalable fabrication of poly(urea-thiourea) nanofiltration membrane elements for extreme pH conditions and efficient alkali recovery. *Sep. Purif. Technol.* **359**, 130563-130579 (2024).

8. Zhang Y, et al. Thin-film composite nanofiltration membrane based on polyurea for extreme pH condition. *J. Membr. Sci.* **635**, 119472-119486 (2021).

9. Zhang Q, Yang Y, Xiang L. Post-curing effect on the chemical structure and its relationship with heat resistance and thermal-mechanical properties of crosslinked PVC foams. *Polymer Testing* **73**, 418-424 (2019).

10. Marchetti P, Jimenez Solomon MF, Szekely G, Livingston AG. Molecular Separation with Organic Solvent Nanofiltration: A Critical Review. *Chem.Rev.* **114**, 10735-10806 (2014).

11. Jimenez-Solomon MF, Song Q, Jelfs KE, Munoz-Ibanez M, Livingston AG. Polymer nanofilms with enhanced microporosity by interfacial polymerization. *Nat. Mater.* **15**, 760-767 (2016).

12. Karan S, Jiang Z, Livingston AG. Sub-10 nm polyamide nanofilms with ultrafast solvent transport for molecular separation. *Science* **348**, 1347-1351 (2015).

13. Liang B, et al. Microporous membranes comprising conjugated polymers with rigid backbones enable ultrafast organic-solvent nanofiltration. *Nat. Chem.* **10**, 961–967 (2018).

14. Huang T, Puspasari T, Nunes SP, Peinemann KV. Ultrathin 2D‐Layered Cyclodextrin Membranes for High‐ Performance Organic Solvent Nanofiltration. *Adv. Funct. Mater.* **30**, 1906797-1906805 (2019).

15. Villalobos LF, Huang T, Peinemann K-V. Cyclodextrin Films with Fast Solvent Transport and Shape‐Selective Permeability. *Adv. Mater.* **29**, 1606641-1606648 (2017).
